# Supplementary material for: Distinct polymer physics principles govern chromatin dynamics in mouse and Drosophila topological domains
Source: PubMed Central journal article supplement (PMC4536789; doi:10.1186/s12864-015-1786-8), 2015-08-15
Supplement: 12864_2015_1786_MOESM2_ESM.pdf [file 12864_2015_1786_MOESM2_ESM.pdf]

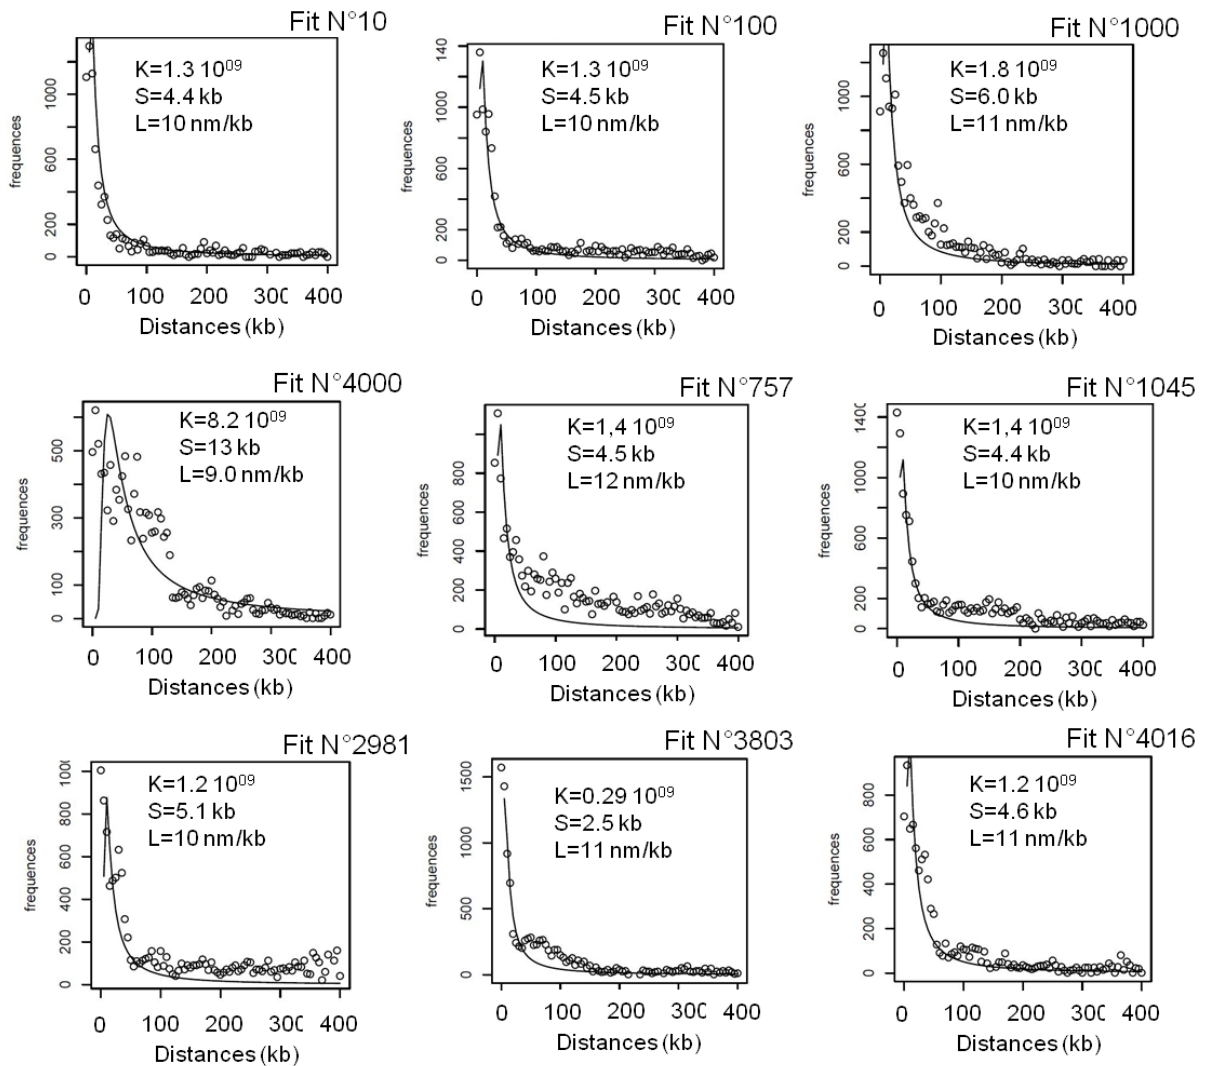

**Additional file 2 : Nine examples of fits of the unconstrained chromatin model [eqs. 1 and 2] on « Virtual 3C » data obtained on *Drosophila melanogaster* chromosome 2L.** Because of the small size of TADs in the *Drosophila*, the unconstrained chromatin model was fitted to the first 70kb of the data. Note that the fit is generally in very good agreement with the unconstrained chromatin model even for larger separation distances.
