# Supplementary material for: Distinct polymer physics principles govern chromatin dynamics in mouse and Drosophila topological domains
Source: PubMed Central journal article supplement (PMC4536789; doi:10.1186/s12864-015-1786-8), 2015-08-15
Supplement: 12864_2015_1786_MOESM3_ESM.pdf [file 12864_2015_1786_MOESM3_ESM.pdf]

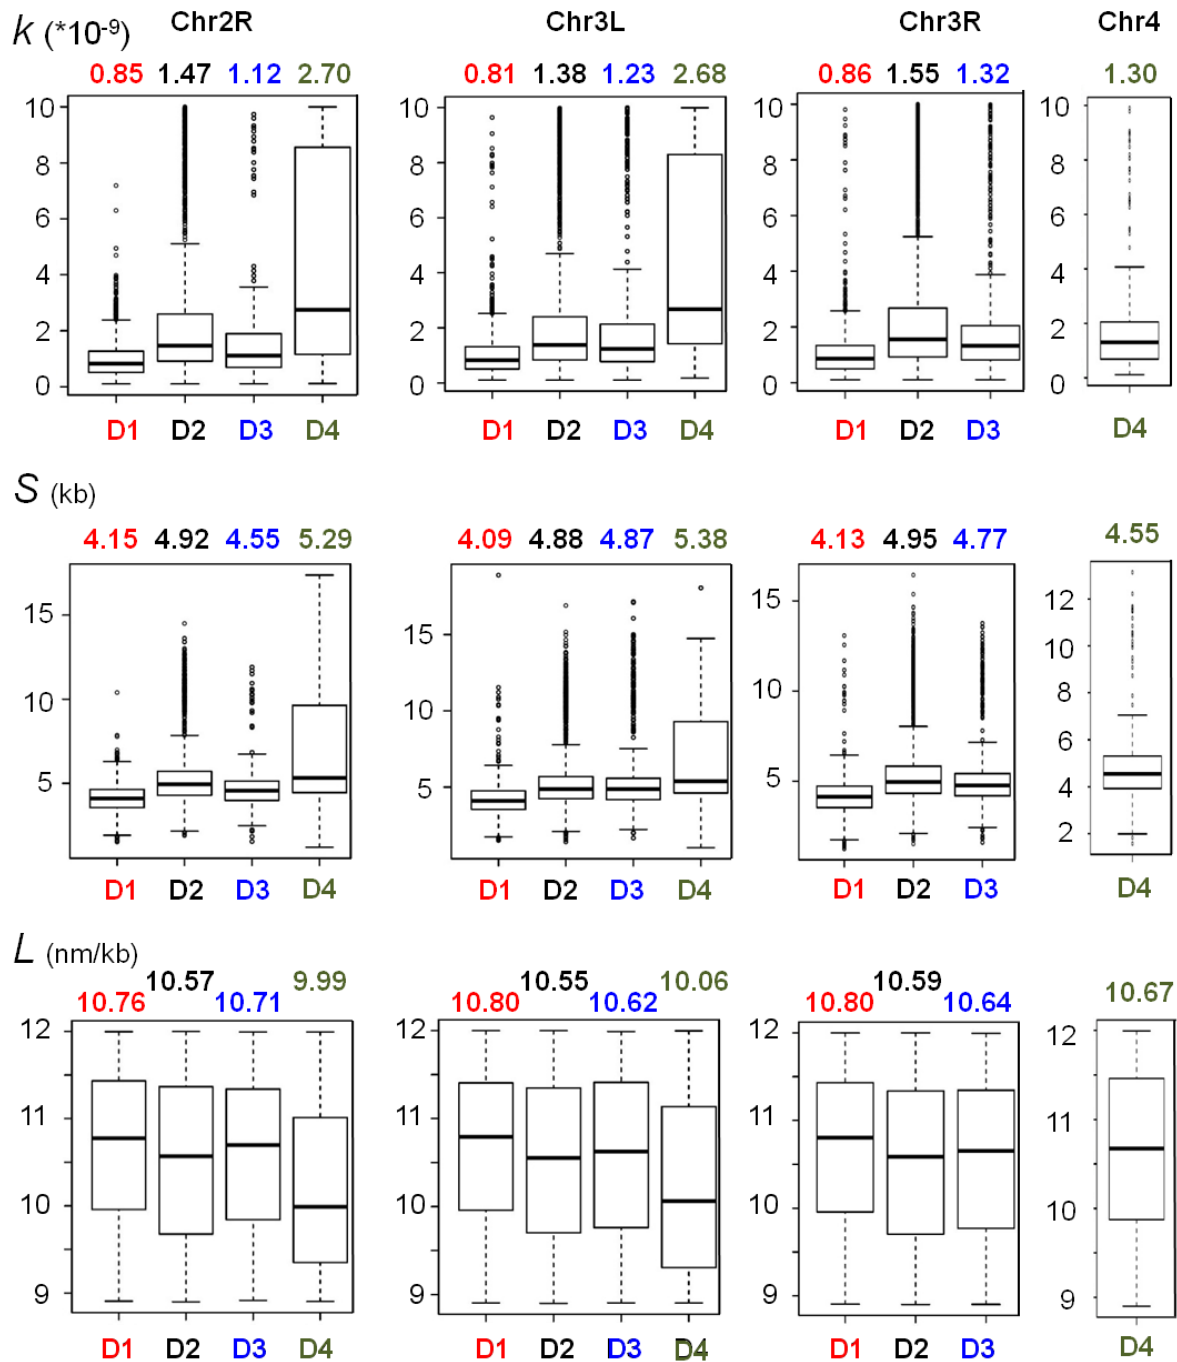

**Additional file 3 : Epigenetic landscapes and chromatin dynamics of the *Drosophila* chromosomes.** “Virtual 3C” were obtained and analysed from each chromosome as described in Figure 4. Statistical analyses of best-fit parameters were performed separately according to the epigenetic domains (Note that chromosome 4 is exclusively composed of D4 Domains, while chromosome 3 is devoid of such domains). Box-plots show the results obtained for each type of domains on each chromosome. Chromosome X was excluded from the analyses because dosage compensation affects epigenetic landscapes of this chromosome in males and the embryos used in the Hi-C experiments were not sexed. The number of best-fits ( $n$ ) performed in each domain is as follows: for chromosome 2R, D1:  $n=1391$ ; D2:  $n=1943$ ; D3:

$n=350$ ; D4:  $n=290$ , for chromosome 3L, D1:  $n=1096$ ; D2:  $n=2650$ ; D3:  $n=609$ ; D4:  $n=272$ ,  
for chromosome 3R, D1:  $n=1525$ ; D2:  $n=3197$ ; D3:  $n=755$ , for chromosome 4, D4:  $n=225$ .
