# Supplementary material for: Distinct polymer physics principles govern chromatin dynamics in mouse and Drosophila topological domains
Source: PubMed Central journal article supplement (PMC4536789; doi:10.1186/s12864-015-1786-8), 2015-08-15
Supplement: 12864_2015_1786_MOESM5_ESM.pdf [file 12864_2015_1786_MOESM5_ESM.pdf]

**Additional file 5: Statistical tests.** This table gives, for each chromosome and each domain, the Wilcox *p*-values for the differences observed between the median values of the three parameters presented in Table 2 (*k*=crosslinking efficiency; *L*=compaction; *S*=flexibility).

|              | <i>k</i>                |                         |                        |                        | <i>S</i> (kb)           |                         |                        |                        | <i>L</i> (nm/kb)       |                        |                        |                        |
|--------------|-------------------------|-------------------------|------------------------|------------------------|-------------------------|-------------------------|------------------------|------------------------|------------------------|------------------------|------------------------|------------------------|
| <b>Chr2L</b> |                         |                         |                        |                        |                         |                         |                        |                        |                        |                        |                        |                        |
| pValue       | D1                      | D2                      | D3                     | D4                     | D1                      | D2                      | D3                     | D4                     | D1                     | D2                     | D3                     | D4                     |
| D1           | 1                       | 7.80 10 <sup>-84</sup>  | 3.33 10 <sup>-33</sup> | 5.27 10 <sup>-55</sup> | 1                       | 2.93 10 <sup>-96</sup>  | 6.51 10 <sup>-42</sup> | 6.12 10 <sup>-42</sup> | 1                      | 1.59 10 <sup>-04</sup> | 0.0462                 | 2 10 <sup>-04</sup>    |
| D2           | 7.80 10 <sup>-84</sup>  | 1                       | 0.0237                 | 3.5 10 <sup>-15</sup>  | 2.93 10 <sup>-96</sup>  | 1                       | 0.197                  | 1.33 10 <sup>-05</sup> | 1.59 10 <sup>-04</sup> | 1                      | 0.498                  | 0.0333                 |
| D3           | 3.33 10 <sup>-33</sup>  | 0.0237                  | 1                      | 6.47 10 <sup>-15</sup> | 6.51 10 <sup>-42</sup>  | 0.197                   | 1                      | 1.47 10 <sup>-05</sup> | 0.0462                 | 0.498                  | 1                      | 0.0373                 |
| D4           | 5.27 10 <sup>-55</sup>  | 3.5 10 <sup>-15</sup>   | 6.47 10 <sup>-15</sup> | 1                      | 6.12 10 <sup>-42</sup>  | 1.33 10 <sup>-05</sup>  | 1.47 10 <sup>-05</sup> | 1                      | 2 10 <sup>-04</sup>    | 0.0333                 | 0.0373                 | 1                      |
| <b>Chr2R</b> |                         |                         |                        |                        |                         |                         |                        |                        |                        |                        |                        |                        |
| D1           | 1                       | 1.63 10 <sup>-109</sup> | 2.29 10 <sup>-14</sup> | 1.53 10 <sup>-60</sup> | 1                       | 6.08 10 <sup>-119</sup> | 1.08 10 <sup>-15</sup> | 6.62 10 <sup>-54</sup> | 1                      | 2.73 10 <sup>-06</sup> | 0.144                  | 2.9 10 <sup>-13</sup>  |
| D2           | 1.63 10 <sup>-109</sup> | 1                       | 2.56 10 <sup>-10</sup> | 1.25 10 <sup>-13</sup> | 6.08 10 <sup>-119</sup> | 1                       | 1.63 10 <sup>-12</sup> | 3.67 10 <sup>-07</sup> | 2.73 10 <sup>-06</sup> | 1                      | 0.169                  | 1.14 10 <sup>-06</sup> |
| D3           | 2.29 10 <sup>-14</sup>  | 2.56 10 <sup>-10</sup>  | 1                      | 4.11 10 <sup>-22</sup> | 1.08 10 <sup>-15</sup>  | 1.63 10 <sup>-12</sup>  | 1                      | 1.10 10 <sup>-17</sup> | 0.144                  | 0.169                  | 1                      | 6.13 10 <sup>-07</sup> |
| D4           | 1.53 10 <sup>-60</sup>  | 1.25 10 <sup>-13</sup>  | 4.11 10 <sup>-22</sup> | 1                      | 6.62 10 <sup>-54</sup>  | 3.67 10 <sup>-07</sup>  | 1.10 10 <sup>-17</sup> | 1                      | 2.9 10 <sup>-13</sup>  | 1.14 10 <sup>-06</sup> | 6.13 10 <sup>-07</sup> | 1                      |
| <b>Chr3L</b> |                         |                         |                        |                        |                         |                         |                        |                        |                        |                        |                        |                        |
| D1           | 1                       | 1.3 10 <sup>-80</sup>   | 1.75 10 <sup>-31</sup> | 5.87 10 <sup>-75</sup> | 1                       | 5.76 10 <sup>-98</sup>  | 1.22 10 <sup>-48</sup> | 2.07 10 <sup>-58</sup> | 1                      | 1.39 10 <sup>-05</sup> | 0.0176                 | 2.77 10 <sup>-11</sup> |
| D2           | 1.3 10 <sup>-80</sup>   | 1                       | 0.0486                 | 1.93 10 <sup>-27</sup> | 5.76 10 <sup>-98</sup>  | 1                       | 0.934                  | 1.69 10 <sup>-10</sup> | 1.39 10 <sup>-05</sup> | 1                      | 0.485                  | 1.11 10 <sup>-06</sup> |
| D3           | 1.75 10 <sup>-31</sup>  | 0.0486                  | 1                      | 1.98 10 <sup>-24</sup> | 1.22 10 <sup>-48</sup>  | 0.934                   | 1                      | 4.46 10 <sup>-08</sup> | 0.0176                 | 0.485                  | 1                      | 7.54 10 <sup>-06</sup> |
| D4           | 5.87 10 <sup>-75</sup>  | 1.93 10 <sup>-27</sup>  | 1.98 10 <sup>-24</sup> | 1                      | 2.07 10 <sup>-58</sup>  | 1.69 10 <sup>-10</sup>  | 4.46 10 <sup>-08</sup> | 1                      | 2.77 10 <sup>-11</sup> | 1.11 10 <sup>-06</sup> | 7.54 10 <sup>-06</sup> | 1                      |
| <b>Chr3R</b> |                         |                         |                        |                        |                         |                         |                        |                        |                        |                        |                        |                        |
| D1           | 1                       | 5.90 10 <sup>-143</sup> | 1.48 10 <sup>-41</sup> |                        | 1                       | 5.21 10 <sup>-158</sup> | 3.6 10 <sup>-52</sup>  |                        | 1                      | 4.06 10 <sup>-08</sup> | 0.00485                |                        |
| D2           | 5.90 10 <sup>-143</sup> | 1                       | 1.59 10 <sup>-08</sup> |                        | 5.21 10 <sup>-158</sup> | 1                       | 8 10 <sup>-07</sup>    |                        | 4.06 10 <sup>-08</sup> | 1                      | 0.268                  |                        |
| D3           | 1.48 10 <sup>-41</sup>  | 1.59 10 <sup>-08</sup>  | 1                      |                        | 3.6 10 <sup>-52</sup>   | 8 10 <sup>-07</sup>     | 1                      |                        | 0.00485                | 0.268                  | 1                      |                        |
